# Supplementary material
Source: PubMed Central journal article supplement (PMC6531621)
Supplement: JB.00026-19-s0001.pdf [file JB.00026-19-s0001.pdf]

A.

**VapB-1**

          -8                  2                  12                  22                  32                  42  
MASMTGGQOM GRDPNSSSML TKVFQSGNSQ AVRIPMDFRF DVDTVEIFRK ENGDVVLRPV  
  
          52                  62                  72  
SKKTDDFLAL FEGFDETFIQ ALEARDDLPP QERENL

B.

**VapC-1**

          10                  20                  30                  40                  50                  60  
MIYMLDTNII IYLMKNRPKI IAERVSQLLP NDRLVMSFIT YAELIKGAFG SQNYEQSIRA  
  
          70                  80                  90                  100                  110                  120  
IELLTERVNV LYPNEQICLH YGKWANTLKK QGRPIGNNDL WIACHALSLN AVLITHNVKE  
  
          130                  140  
FQRITDLQWQ DWTKLEHHHH HH

**Figure S1.** Primary sequence of the VapBC-1 complex used for crystallization screening. A) VapB-1 and B) VapC-1. The underlined residues are from the pET24b cloning vector.

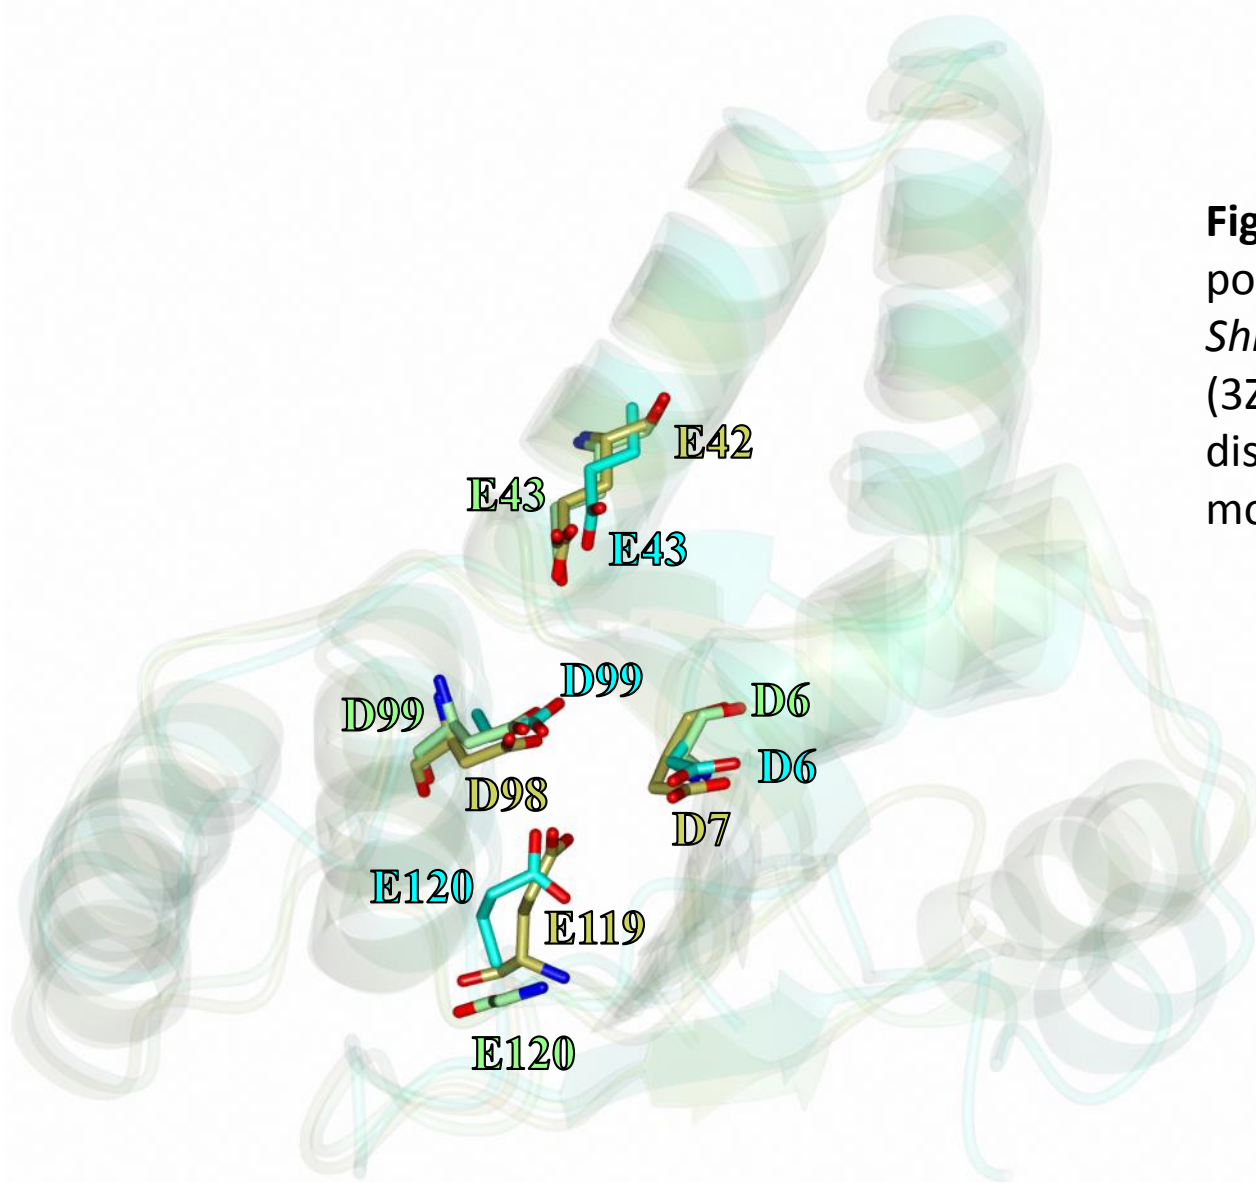

**Figure S2.** Comparison of the active site residue positions of VapC-1 (subunit B, cyan) with *Shigella flexneri* (3TND, gold) and *Rickettsia felis* (3ZVK, green). Residue E120 in 3ZVK is disordered and the backbone atoms only were modeled.

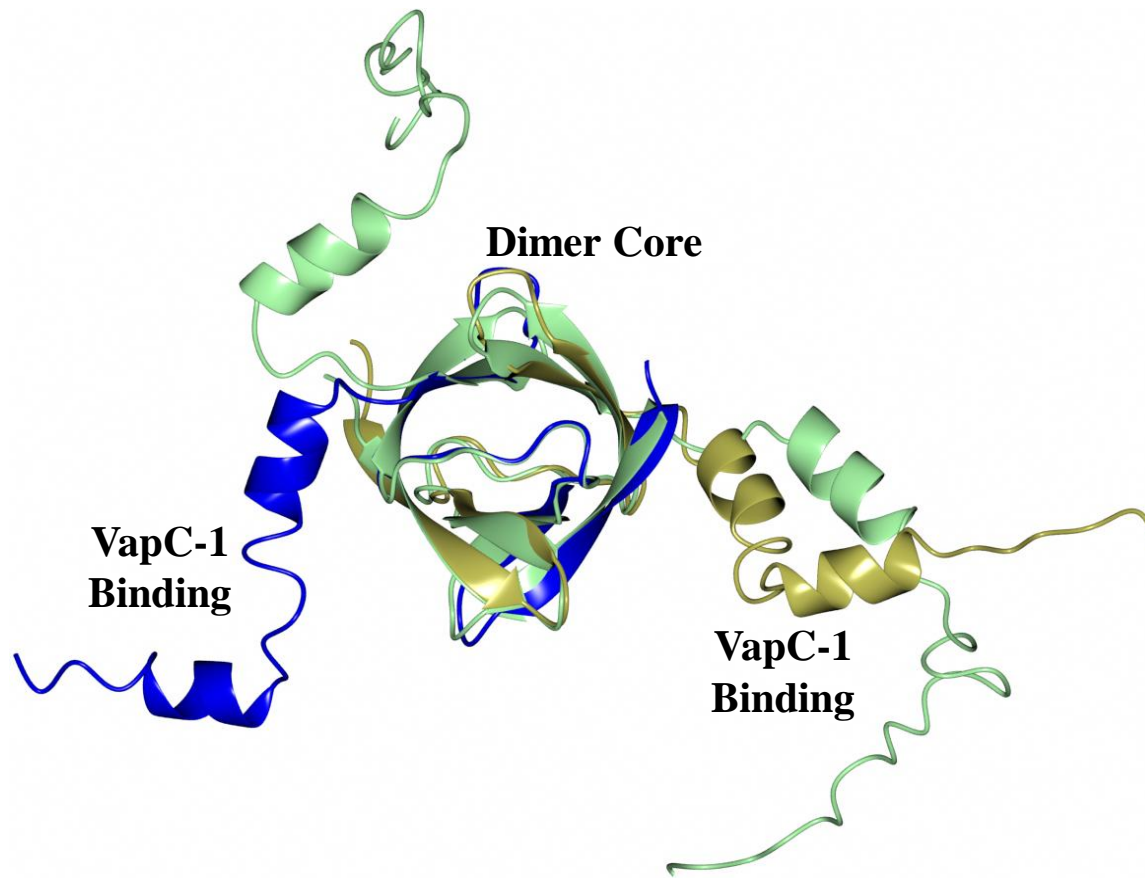

**Figure S3.** Comparison of the *H. influenzae* VapB-1 dimer (gold/blue) with the VapB dimer of *R. felis* (green) from the VapBC structure in complex with DNA (PDB 3ZVK).

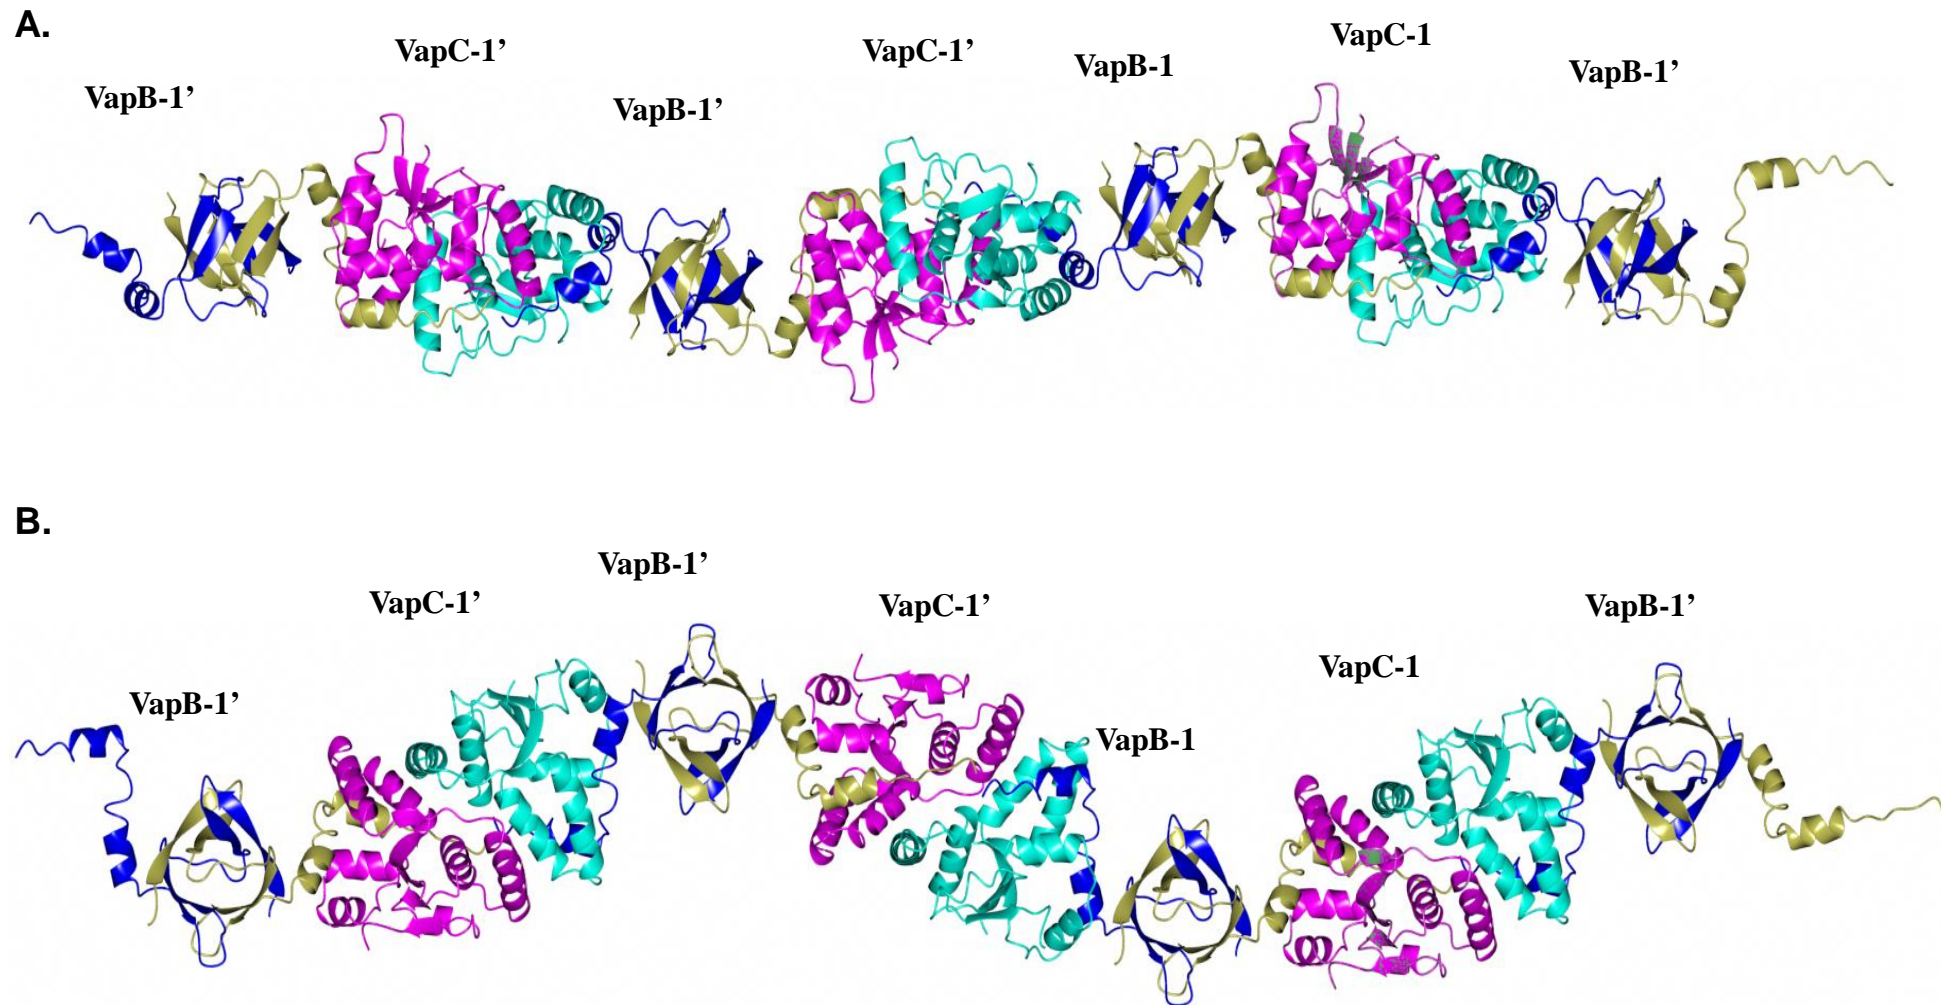

**Figure S4.** Crystal packing of VapBC-1 with VapB-1 chains C/D (gold/blue) and VapC-1 chains A/B (magenta/cyan). The VapBC-1 dimers form a linear chain that propagates in a spiral ( $2_1$  screw) along the crystallographic  $c$ -axis. VapB-1' and VapC-1' molecules are those related by crystallographic symmetry. A) Viewed along the crystallographic  $a$ -axis and B)  $b$ -axis.

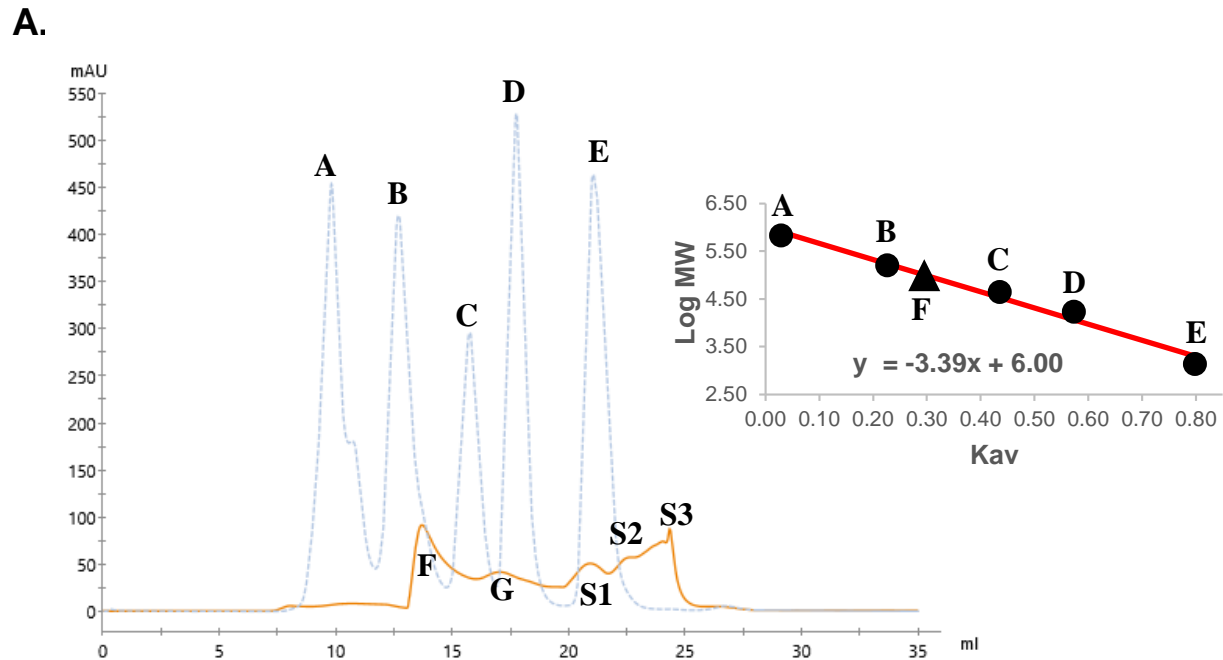

| Peak | Protein Standard | Molecular Weight (Da) | Elution Volume (mL) | Kav  | Log MW |
|------|------------------|-----------------------|---------------------|------|--------|
| A    | Thyroglobulin    | 670,000               | 9.82                | 0.03 | 5.90   |
| B    | gamma globulin   | 158,000               | 12.7                | 0.23 | 5.24   |
| C    | Ovalbumin        | 44,000                | 15.75               | 0.44 | 4.53   |
| D    | Myoglobin        | 17,000                | 17.76               | 0.57 | 4.06   |
| E    | Vitamin B12      | 1,350                 | 21.05               | 0.80 | 3.30   |
| F    | VapBC            | 101,000               | 13.7                | 0.30 | 5.00   |
| G    | VapBC            | 17,000                | 17.06               | 0.52 | 4.22   |

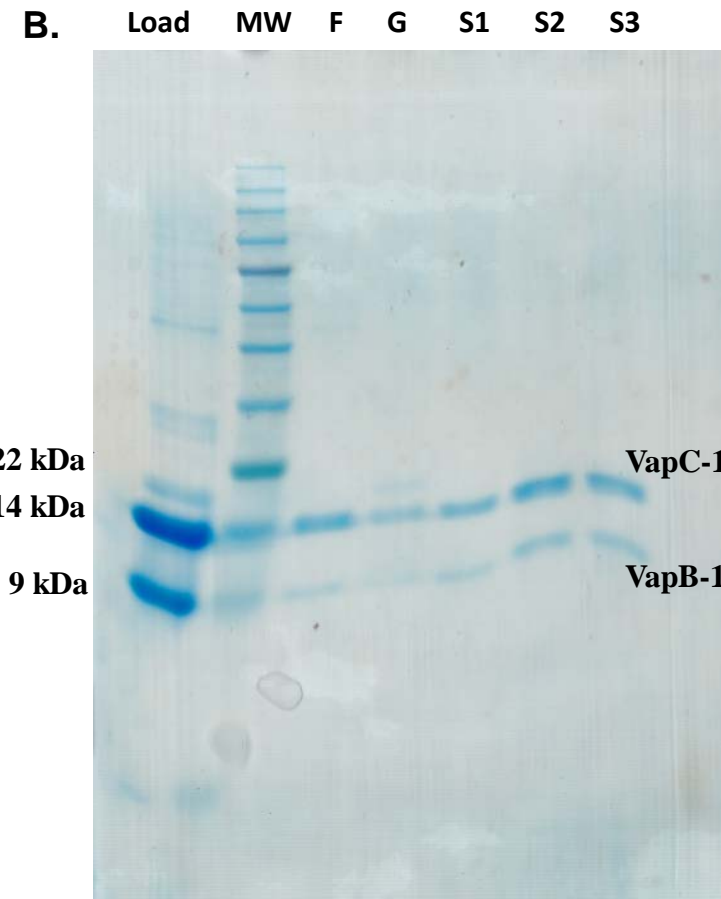

**Figure S5.** Size exclusion chromatography (Superdex 200) of the coexpressed VapBC-1 complex. A) Chromatogram showing the elution volumes of the calibration standards (blue dashed line) superimposed with the VapBC sample (orange solid line). The calibration plot (Log MW vs Kav) is shown as an inset on the chromatogram and the data points for each standard is represented as a black circle and the best-fit line determined by linear regression is indicated by the red line. The estimated molecular weight of the first VapBC-1 fraction (peak F), based on the column calibration, is indicated by the triangle. Elution volumes and molecular weights are provided in the table.  $K_{av} = (V_e - V_o) / (V_c - V_o)$  which accounts for the sample elution volume ( $V_e$ ), void volume of the column ( $V_o$ ) and the geometric column volume ( $V_c$ ). The additional peaks that contained VapBC-1, which are outside of the column calibration, are noted as peaks S1-S3. B) SDS-PAGE analysis of the VapBC-1 elution fractions. Samples were analyzed for peak fractions F, G and S1-S3.

A

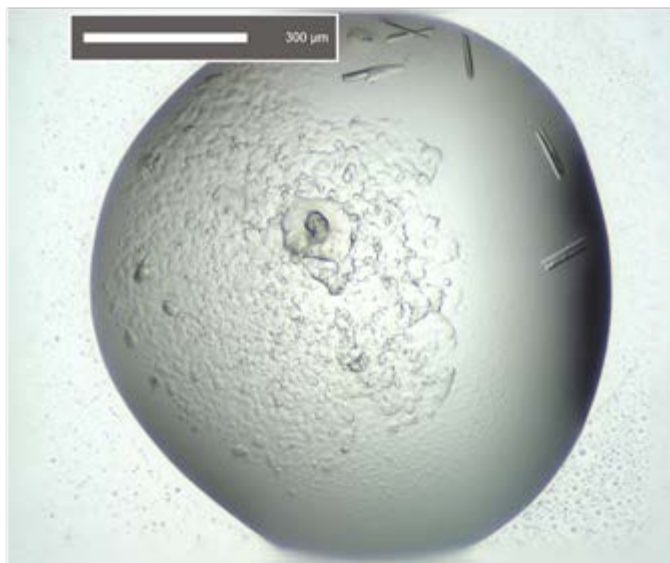

B

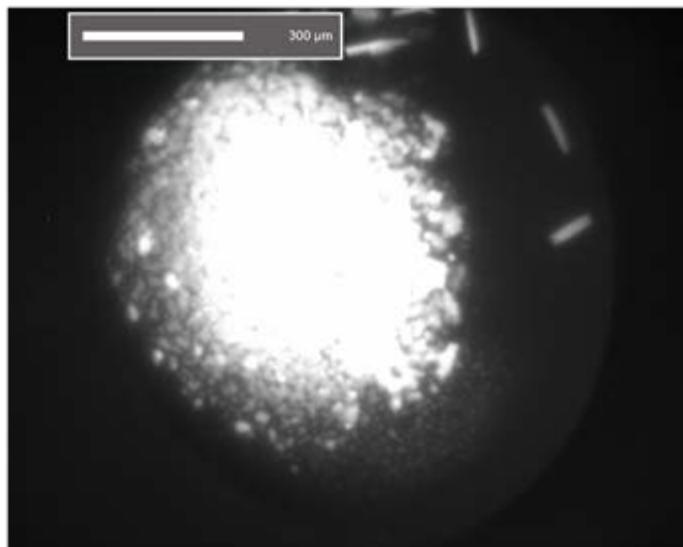

**Figure S6.** Crystals of VapBC-1. A) Visible light image and B) UV fluorescence image.

**Table S1.** Bacteria, plasmids and primers used in this study.

| <b>Strains</b>                   | <b>Description</b>                                                                                                                                                                                                    | <b>Source</b>            |
|----------------------------------|-----------------------------------------------------------------------------------------------------------------------------------------------------------------------------------------------------------------------|--------------------------|
| DH5 $\alpha$                     | F <sup>-</sup> $\Phi$ 80/ <i>lacZ</i> $\Delta$ M15 $\Delta$ ( <i>lacZYA-argF</i> )<br>U169 <i>recA1 endA1 hsdR17</i> (rK <sup>-</sup> ,<br>mK <sup>+</sup> ) <i>phoA supE44</i> $\lambda$ - <i>thi-1 gyrA96 relA1</i> | Laboratory<br>collection |
| LMG194                           | F <sup>-</sup> $\Delta$ <i>lacX74 galE thi rpsL</i> $\Delta$ <i>phoA</i> ( <i>Pvull</i> ) $\Delta$ <i>ara714</i><br><i>leu::Tn10</i>                                                                                  | Invitrogen               |
| SU101                            | <i>lexA71::Tn5</i> (Def) <i>sulA211</i> $\Delta$ ( <i>lacIPOZYA</i> )169/F'<br><i>lacI<sup>q</sup> lacZ M15::Tn9</i>                                                                                                  | M. Granger-<br>Schnarr   |
| SU202                            | <i>lexA71::Tn5</i> (Def) <i>sulA211</i> $\Delta$ ( <i>lacIPOZYA</i> )169/F'<br><i>lacI<sup>q</sup> lacZ M15::Tn9</i>                                                                                                  | M. Granger-<br>Schnarr   |
| 86-028NP $\Delta$ <i>vapBC-1</i> | Strain 86-028NP with the <i>vapBC-1</i> locus deleted                                                                                                                                                                 | (1)                      |
| <b>Plasmids</b>                  | <b>Description</b>                                                                                                                                                                                                    | <b>Source</b>            |
| pBAD33                           | Highly regulated expression vector                                                                                                                                                                                    | (2)                      |
| pET24b                           | Regulated expression vector with His tag                                                                                                                                                                              | Novagen                  |
| pBluescript SK(+)                | Cloning vector                                                                                                                                                                                                        | (1)                      |
| pSR658                           | WT LexA DBD fusion vector                                                                                                                                                                                             | (3)                      |
| pSR659                           | Mutant LexA DBD fusion vector                                                                                                                                                                                         | (3)                      |
| pSR660                           | WT LexA DBD fusion vector                                                                                                                                                                                             | (3)                      |
| pSR661                           | Mutant LexA DBD fusion vector                                                                                                                                                                                         | (3)                      |
| pDD686                           | <i>vapBC-1</i> in pET24b                                                                                                                                                                                              | (4)                      |
| pDD757                           | <i>vapBC-1</i> ( <i>vapC-1</i> D6N) in pET24b                                                                                                                                                                         | Unpublished              |
| pDD758                           | <i>vapBC-1</i> ( <i>vapC-1</i> D99N) in pET24b                                                                                                                                                                        | (5)                      |



|         |                                                   |             |
|---------|---------------------------------------------------|-------------|
| pDD866  | <i>vapB-1</i> in pSR658                           | (1)         |
| pDD935  | <i>vapB-1</i> in pTrcHisA                         | Unpublished |
| pDD946  | <i>vapC-1</i> in pBAD33                           | Unpublished |
| pDD1058 | 5' end of NTHI_RS09270 in pBluescript SK(+)       | This work   |
| pDD1063 | 3' end of NTHI_RS09270 in pDD1058                 | This work   |
| pDD1118 | <i>vapBC-1</i> ( <i>vapC-1</i> D6N/D99N) in pUC57 | Genscript   |
| pDD1119 | <i>vapC-1</i> D6N/D99N in pBAD33                  | This work   |
| pDD1120 | <i>vapC-1</i> D99N in pSR658                      | This work   |
| pDD1123 | <i>vapC-1</i> D99N in pSR659                      | This work   |
| pDD1126 | <i>vapC-1</i> D6N in pSR661                       | This work   |
| pDD1128 | <i>vapC-1</i> D6N/D99N in pSR661                  | This work   |
| pDD1132 | <i>vapC-1</i> D6N in pBAD33                       | This work   |
| pDD1133 | <i>vapC-1</i> D99N in pBAD33                      | This work   |
| pDD1140 | NTHI_RS09270-targeted delivery vector             | This work   |
| pDD1150 | <i>vapC-1</i> in pSR659                           | This work   |
| pDD1152 | <i>vapC-1</i> D6N in pET24b                       | This work   |
| pDD1153 | <i>vapC-1</i> D99N in pET24b                      | This work   |
| pDD1154 | <i>vapC-1</i> D6N/D99N in pET24b                  | This work   |
| pDD1155 | pDD1140 with the native <i>vapBC-1</i> promoter   | This work   |
| pDD1159 | pDD1155 with <i>vapB-1vapC-1</i> D6N              | This work   |
| pDD1160 | pDD1155 with <i>vapB-1vapC-1</i> D99N             | This work   |
| pDD1161 | pDD1155 with <i>vapB-1vapC-1</i> D6N/D99N         | This work   |
| pDD1165 | <i>vapBC-1</i> ( <i>vapC-1</i> E43Q) in pCR2.1    | Eurofins    |



|                |                                                 |               |
|----------------|-------------------------------------------------|---------------|
| pDD1166        | <i>vapBC-1</i> ( <i>vapC-1</i> E120Q) in pCR2.1 | Eurofins      |
| pDD1167        | pDD1155 with <i>vapB-1vapC-1</i> E43Q           | This work     |
| pDD1168        | pDD1155 with <i>vapB-1vapC-1</i> E120Q          | This work     |
| pDD1169        | pDD1155 with <i>vapB-1vapC-1</i> wild-type      | This work     |
| pDD1170        | <i>vapC-1</i> E43Q in pSR658                    | This work     |
| pDD1173        | <i>vapC-1</i> E43Q in pET24b                    | This work     |
| pDD1174        | <i>vapC-1</i> E120Q in pBAD33                   | This work     |
| pDD1175        | <i>vapC-1</i> E43Q in pBAD33                    | This work     |
| pDD1177        | <i>vapC-1</i> E120Q in pSR658                   | This work     |
| pDD1178        | <i>vapC-1</i> E43Q in pSR659                    | This work     |
| pDD1179        | <i>vapC-1</i> E120Q in pSR659                   | This work     |
| pDD1194        | <i>vapC-1</i> E43Q/D99N in pBAD33               | This work     |
| pDD1196        | <i>vapC-1</i> E43Q/D99N in pBAD/Myc-HisA        | This work     |
| pDD1199        | <i>vapC-1</i> E43Q/D99N in pSR658               | This work     |
| pDD1200        | <i>vapC-1</i> E43Q/D99N in pSR659               | This work     |
| pDD1204        | pDD1155 with <i>vapB-1vapC-1</i> E43Q/D99N      | This work     |
| <b>Primers</b> | <b>Description</b>                              | <b>Source</b> |
| D6NFor         | [Phos]AACACCAATATCATTATTTATTTAATG               | IDT           |
| D6NRev         | [Phos]TAACATATAAATCATAAATTTTCTCG                | IDT           |
| 321LexFor      | GAGGGAGCTCATGCTTACTAAAGTG                       | IDT           |
| 321LexRev      | AACAGGTACCTCATAAATTTTCTCG                       | IDT           |
| 322LexFor      | GAGAGAGCTCATGATTATATGTTAG                       | IDT           |
| 322LexRev      | TCAGGGTACCCTATTTTGTCCAATCTTGCC                  | IDT           |

|                |                                  |          |
|----------------|----------------------------------|----------|
| pETD6NC1SacFor | AAAAGAGCTCTATGATTTATATGTTAAACACC | Eurofins |
| 322Rev         | TCAGAAGCTTCTATTTTGTCCAATCTTGCC   | IDT      |
| pBAD86C1SacFor | TTACGAGCTCAGGAGCGAGAAAATTTATG    | Eurofins |
| XLacIFor       | GTCATCTAGAAAACGCGCGAGGCAGC       | Eurofins |
| XHisRev        | TATTTGTCTAGAGGCAGTTCCTACTCTCG    | Eurofins |
| 86C1NdeD6NFor  | AAACATATGATTTATATGTTAAACAC       | Eurofins |
| VapCXhoRev     | GAATCTCGAGTTTTGTCCAATCTTGCC      | Eurofins |
| 86C1NdeFor     | AAAACATATGATTTATATGTTAGAC        | Eurofins |
| PermCSpeFor    | AAATACTAGTAACACACACGCCATTCC      | Eurofins |
| ErmCSpeRev     | GTAACTAGTGCAGTTATGCATCC          | Eurofins |
| BC1PromBamFor  | ACTAGGATCCATCATTACTCATTGACTTGC   | Eurofins |
| BC1PromNdeRev  | TAAGCATATGTACCCTCTCGTATATAC      | Eurofins |
| 86B1NdeFor     | GGTACATATGCTTACTAAAGTG           | Eurofins |
| 2009-1SacFor   | TGCCGAGCTCGCAGGTAAGATGTCCG       | Eurofins |
| 2009-1XbaRev   | AAAATCTAGAGATGCACGTGCAACC        | Eurofins |
| 2009-2XhoFor   | AAAACCTCGAGGCTTGCATCTAATGC       | Eurofins |
| 2009-2KpnRev   | AAAAGGTACCTCACTATCTTGTGCC        | Eurofins |

### References:

1. Ren D, Walker AN, Daines DA. 2012. Toxin-antitoxin loci vapBC-1 and vapXD contribute to survival and virulence in nontypeable *Haemophilus influenzae*. *BMC Microbiol* 12:263.

2. Guzman LM, Belin D, Carson MJ, Beckwith J. 1995. Tight regulation, modulation, and high-level expression by vectors containing the arabinose PBAD promoter. *J Bacteriol* 177:4121-30.
3. Daines DA, Silver RP. 2000. Evidence for multimerization of neu proteins involved in polysialic acid synthesis in *Escherichia coli* K1 using improved LexA-based vectors. *J Bacteriol* 182:5267-70.
4. Daines DA, Wu MH, Yuan SY. 2007. VapC-1 of nontypeable *Haemophilus influenzae* is a ribonuclease. *J Bacteriol* 189:5041-8.
5. Cline SD, Saleem S, Daines DA. 2012. Regulation of the vapBC-1 toxin-antitoxin locus in nontypeable *Haemophilus influenzae*. *PLoS One* 7:e32199.
